# Supplementary material for: Oncolytic Rodent Protoparvoviruses Evade a TLR- and RLR-Independent Antiviral Response in Transformed Cells
Source: MDPI journal article supplement (doi:10.3390/pathogens12040607), 2023-04-17

**Figure S1**

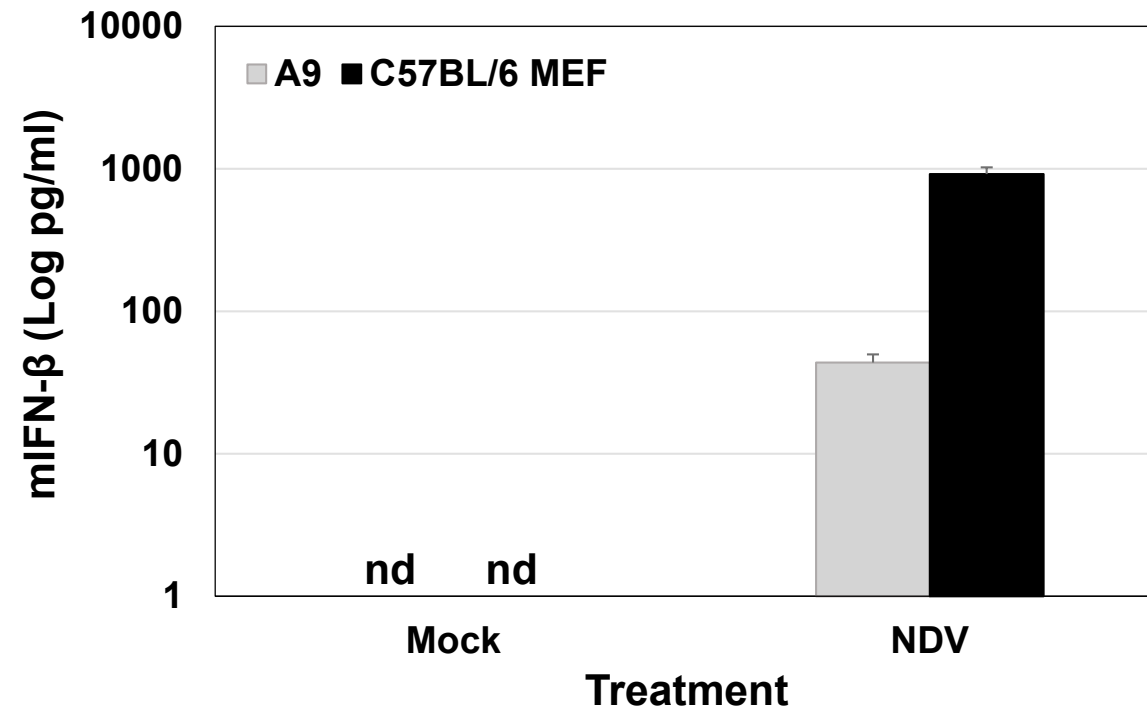

# Figure S2

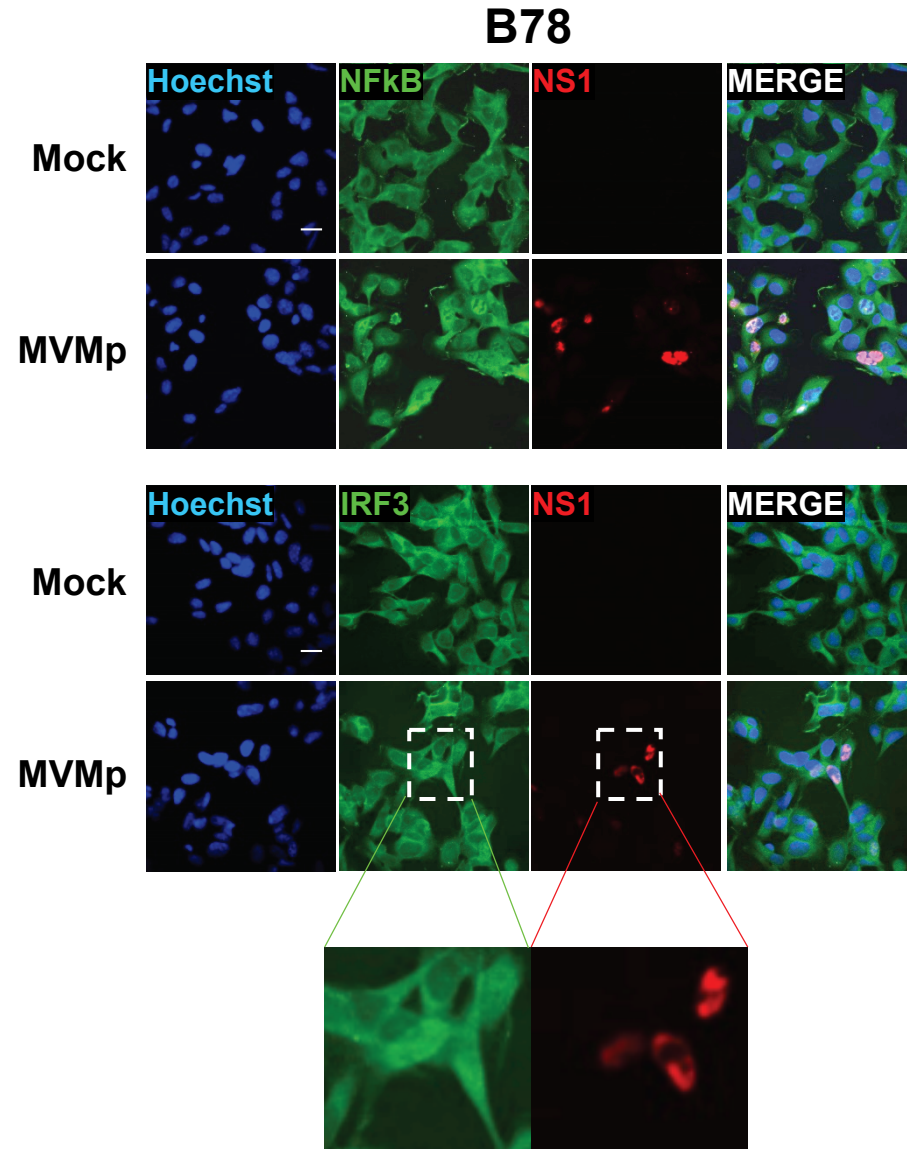

**Figure S3**

**A**

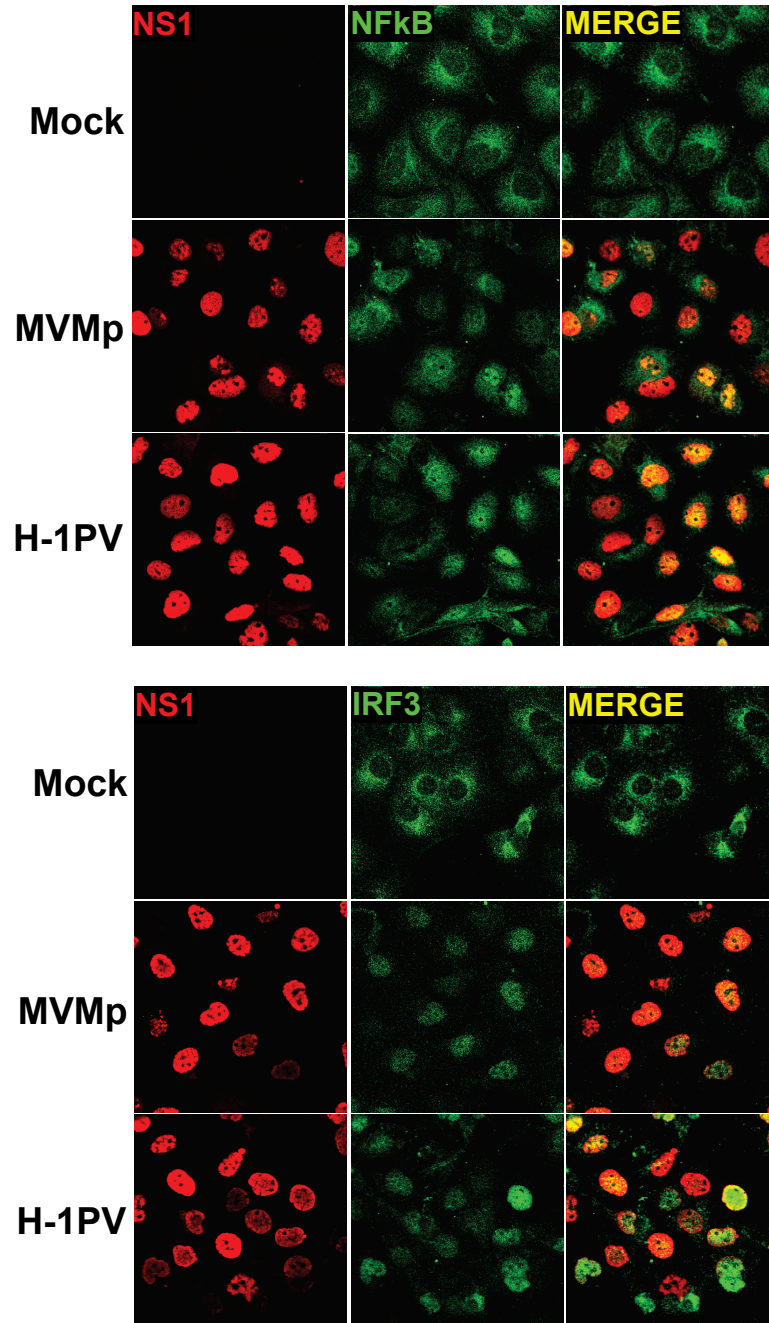

**B**

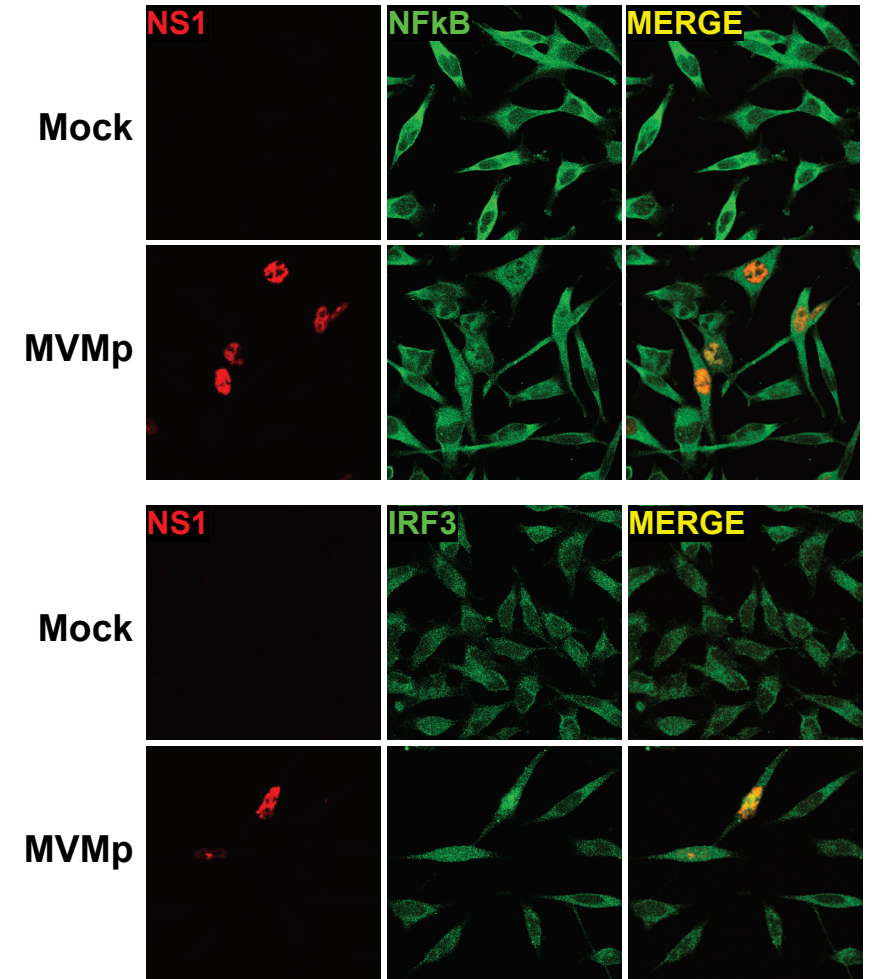

# Figure S4

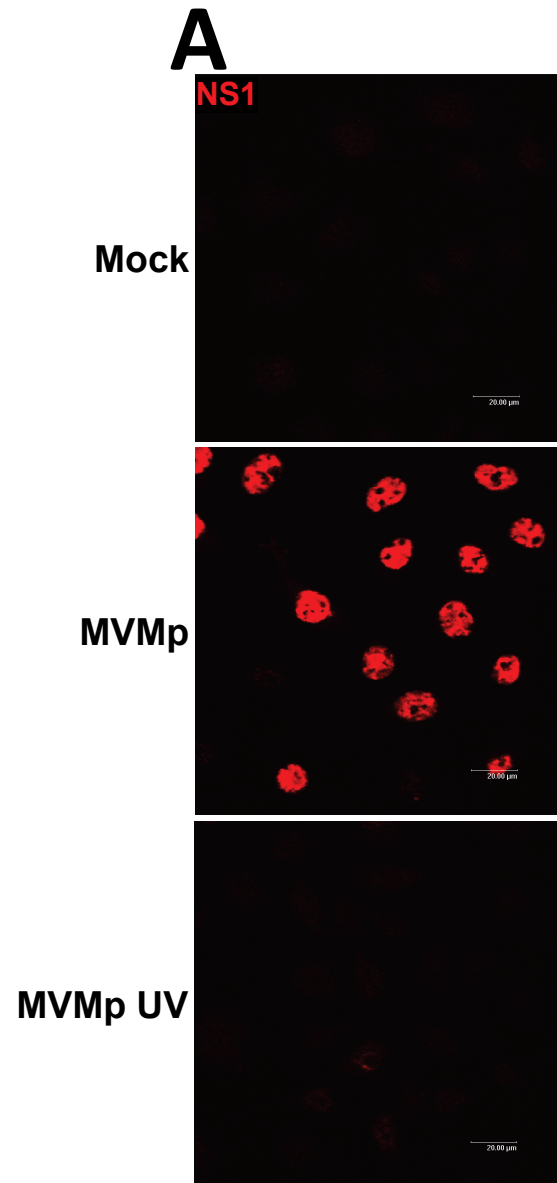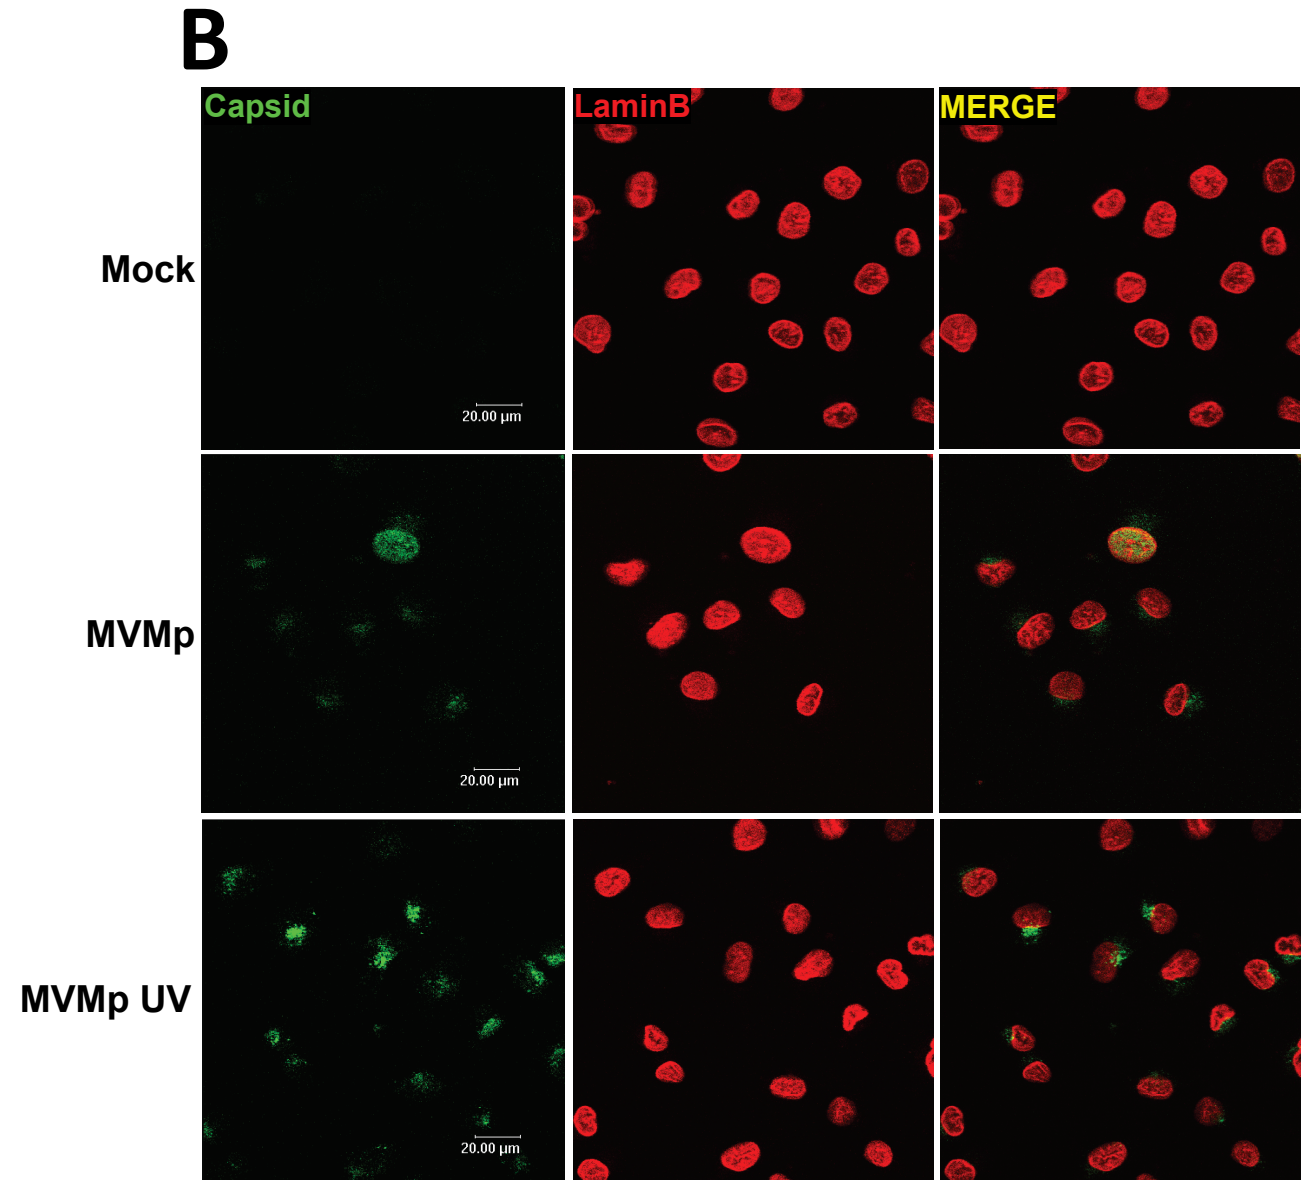



# Figure S5

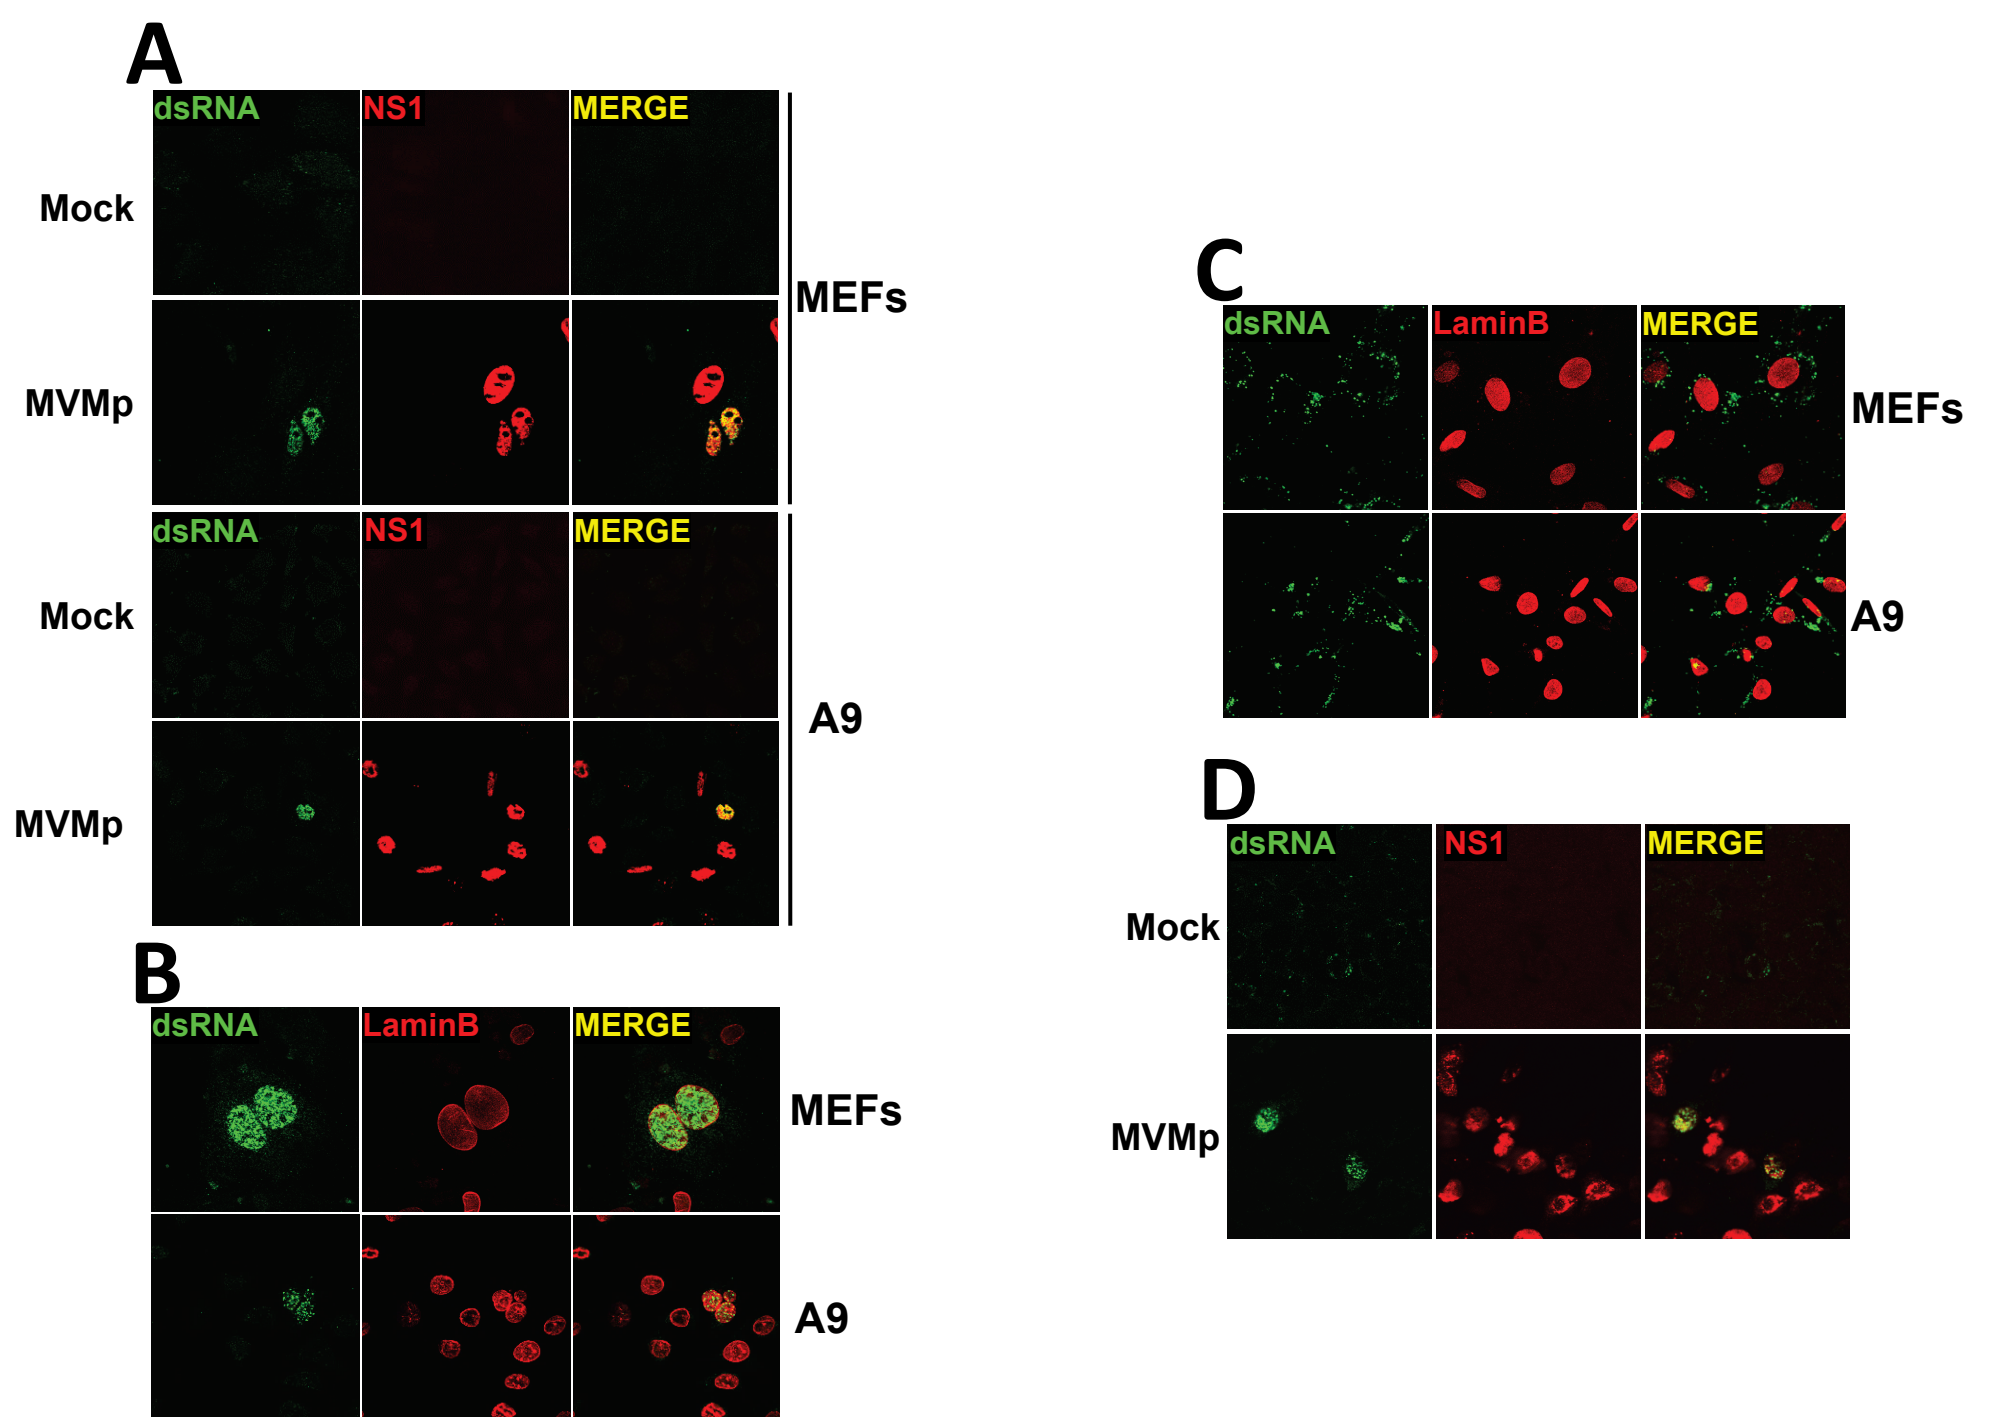

**Figure S6**

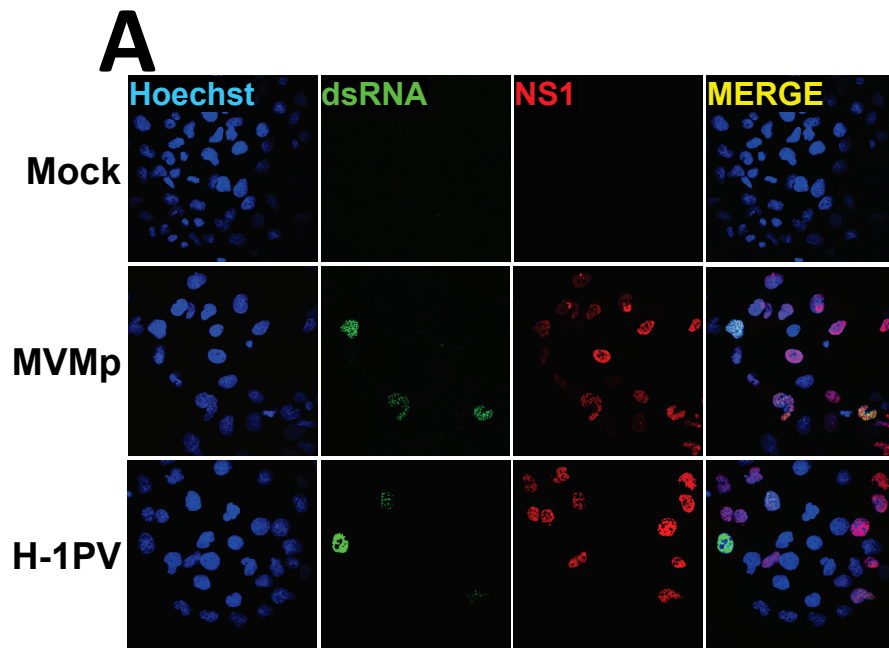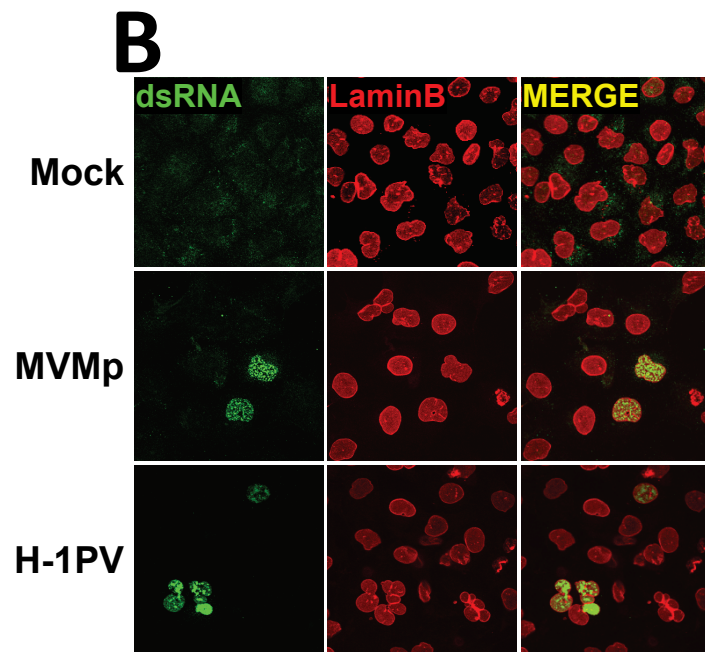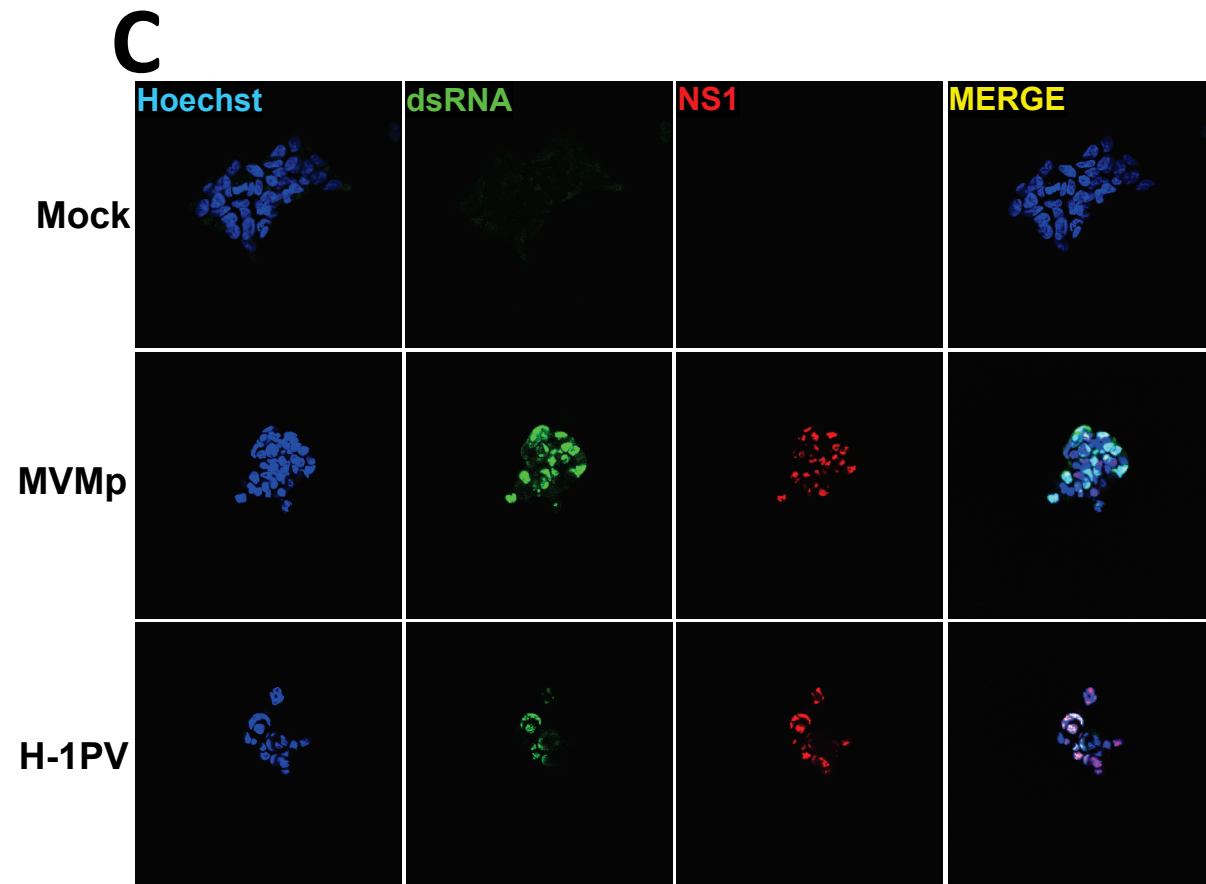

# Figure S7

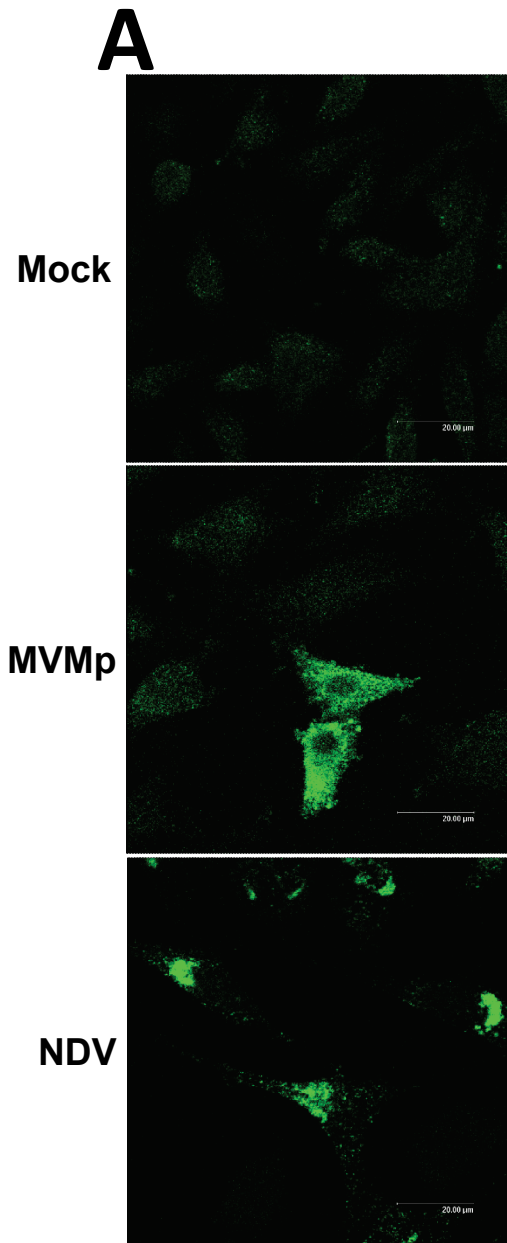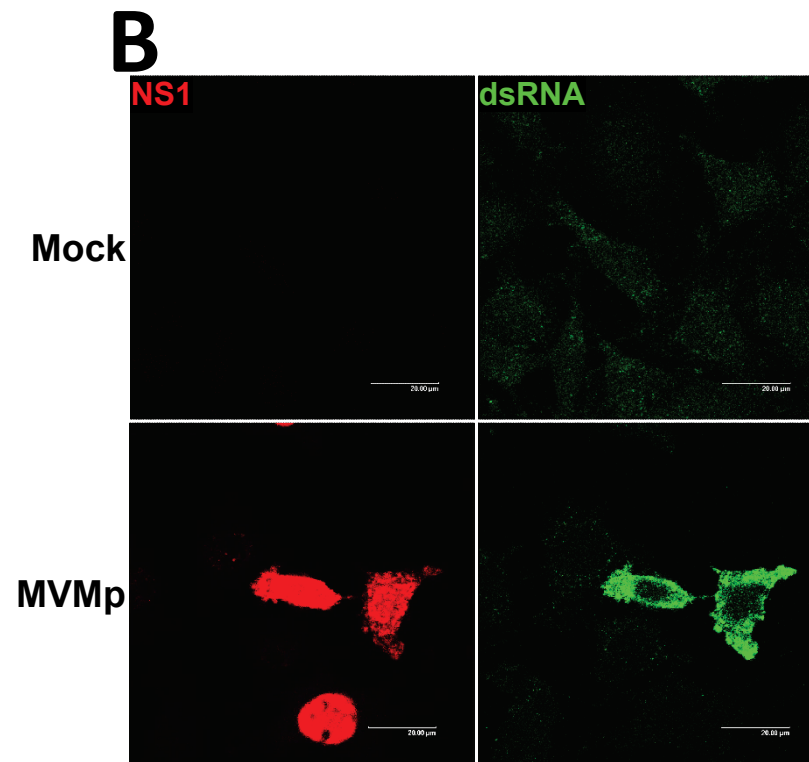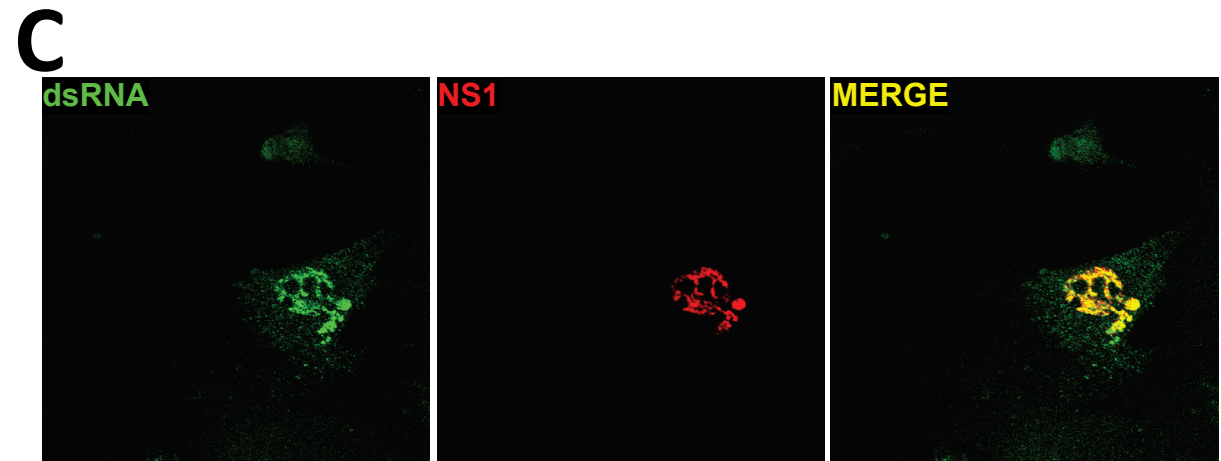

# Figure S8

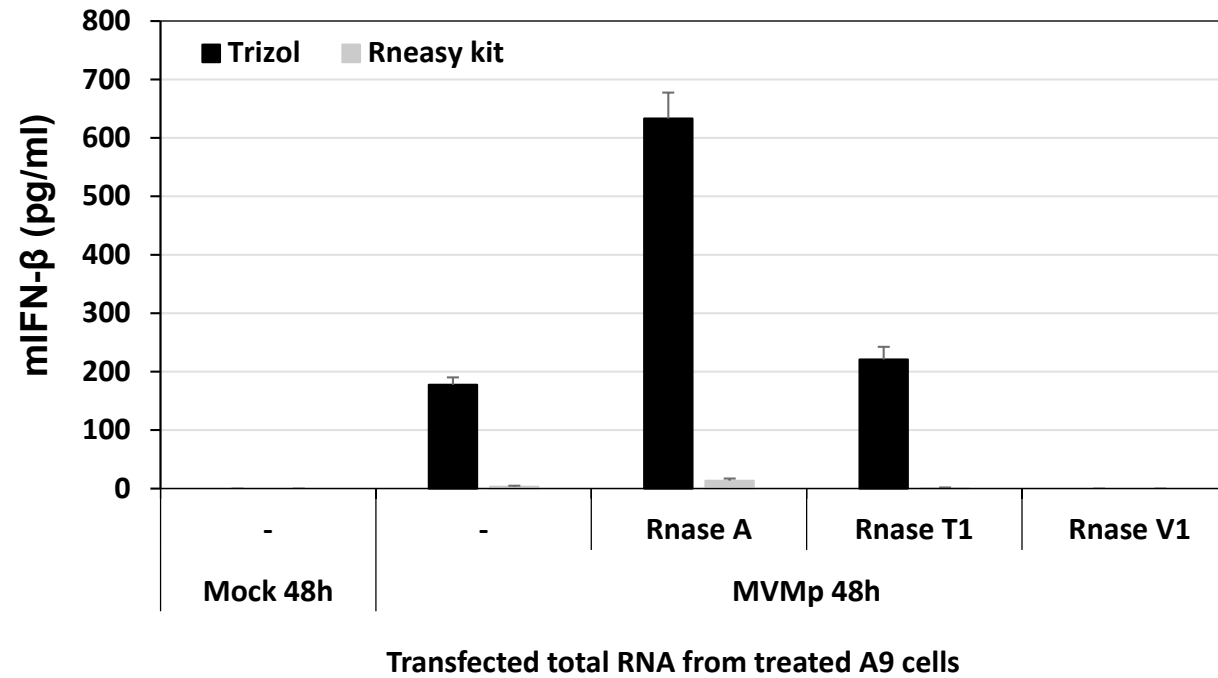



# Figure S9

Output of sir\_graph (6)  
msd\_until 4.7

Created Tue Feb 28 13:04:05 2023 graph (6)

Created Tue Feb 28 13:04:05 2023

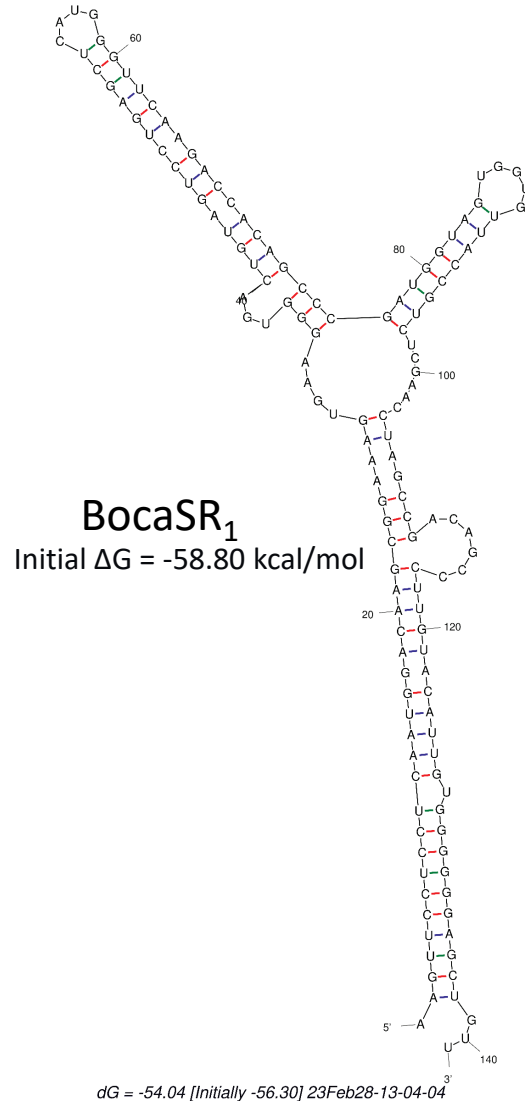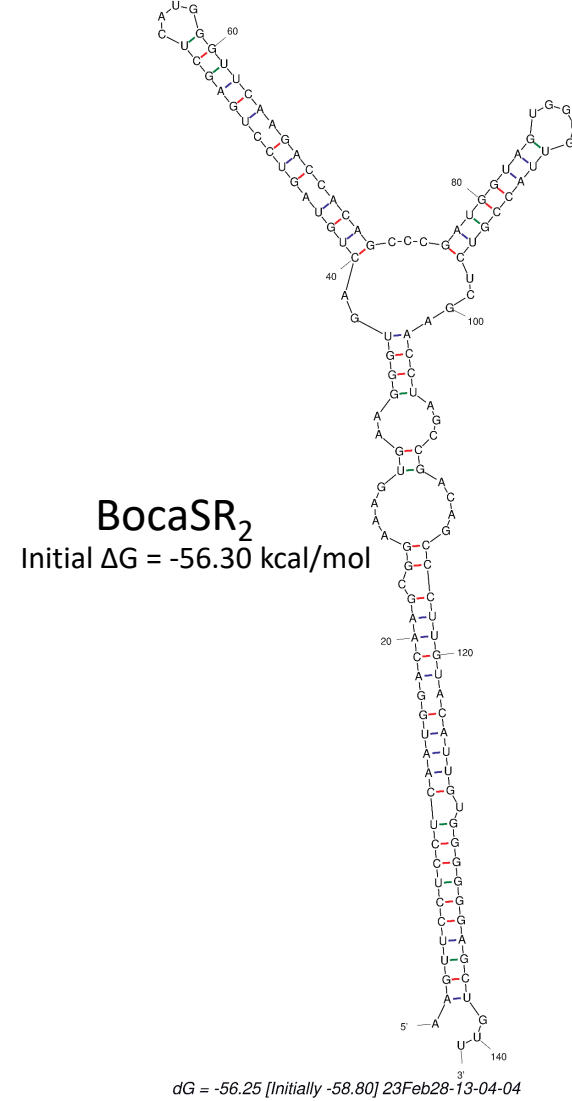

# Figure S10

A

MVMPsR  
H-1PV  
4932

1  
CTATTCAGTGAACCAACTGAACCATTAGTATTACTATGTTTTTAGGGTGGGAGGGTGGGAGATACATGTGTTTCGCTATGAGCGAACTGGTACTGGTTGGTTGCTCTGCTCAACCAACCAGACCGGCCAAAGCCGGTCTGGTTGGTTGAGC  
CTATTCAGTTGACCAACTGAACCTATAGTATCACTATGTTTTTAGGGTGGGGGGGTGGGAGATACATACGTTTCGCTATGGACCAAGTGGTACC<sup>149</sup>CGGTTGGTTGCTAAGCT---CGAACAGA-CGGCTAAGCCGGTCCGGTTGGTTGAGC  
5076

B

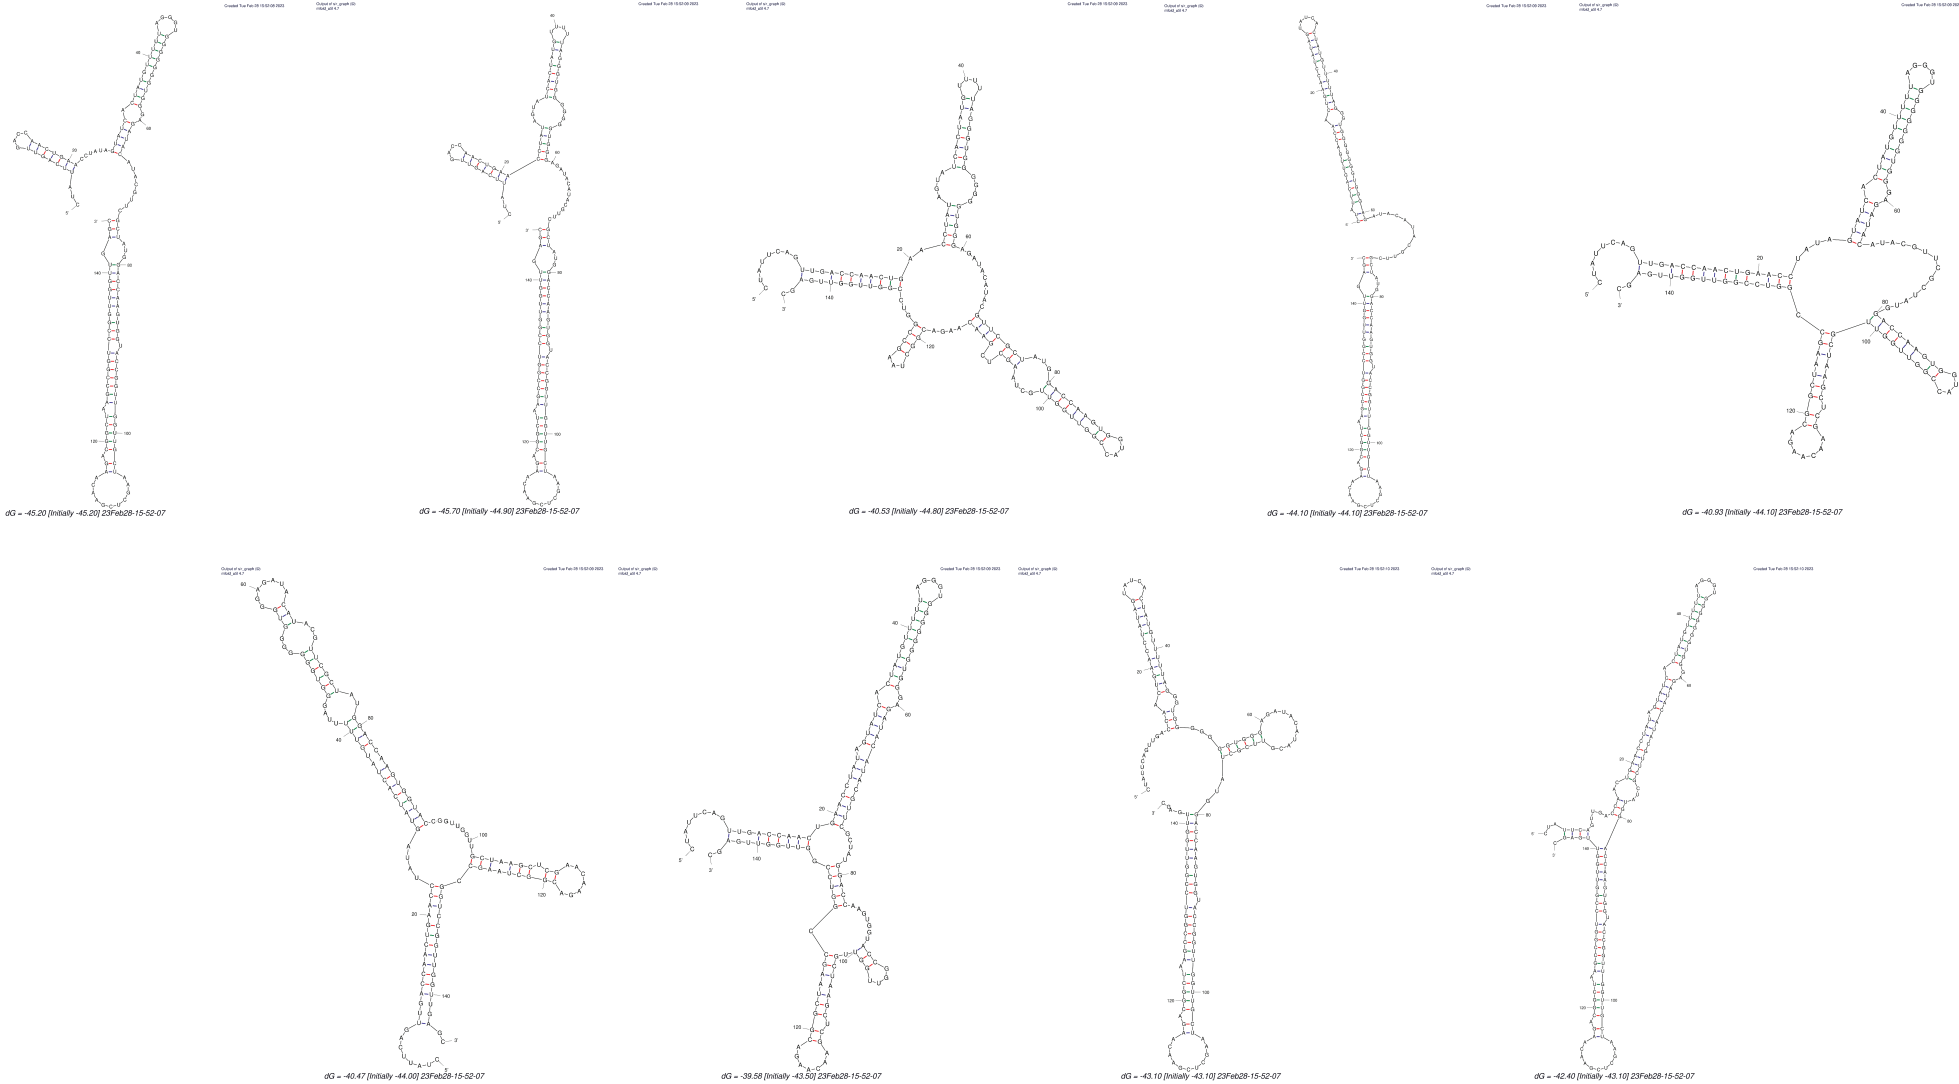

# Figure S11

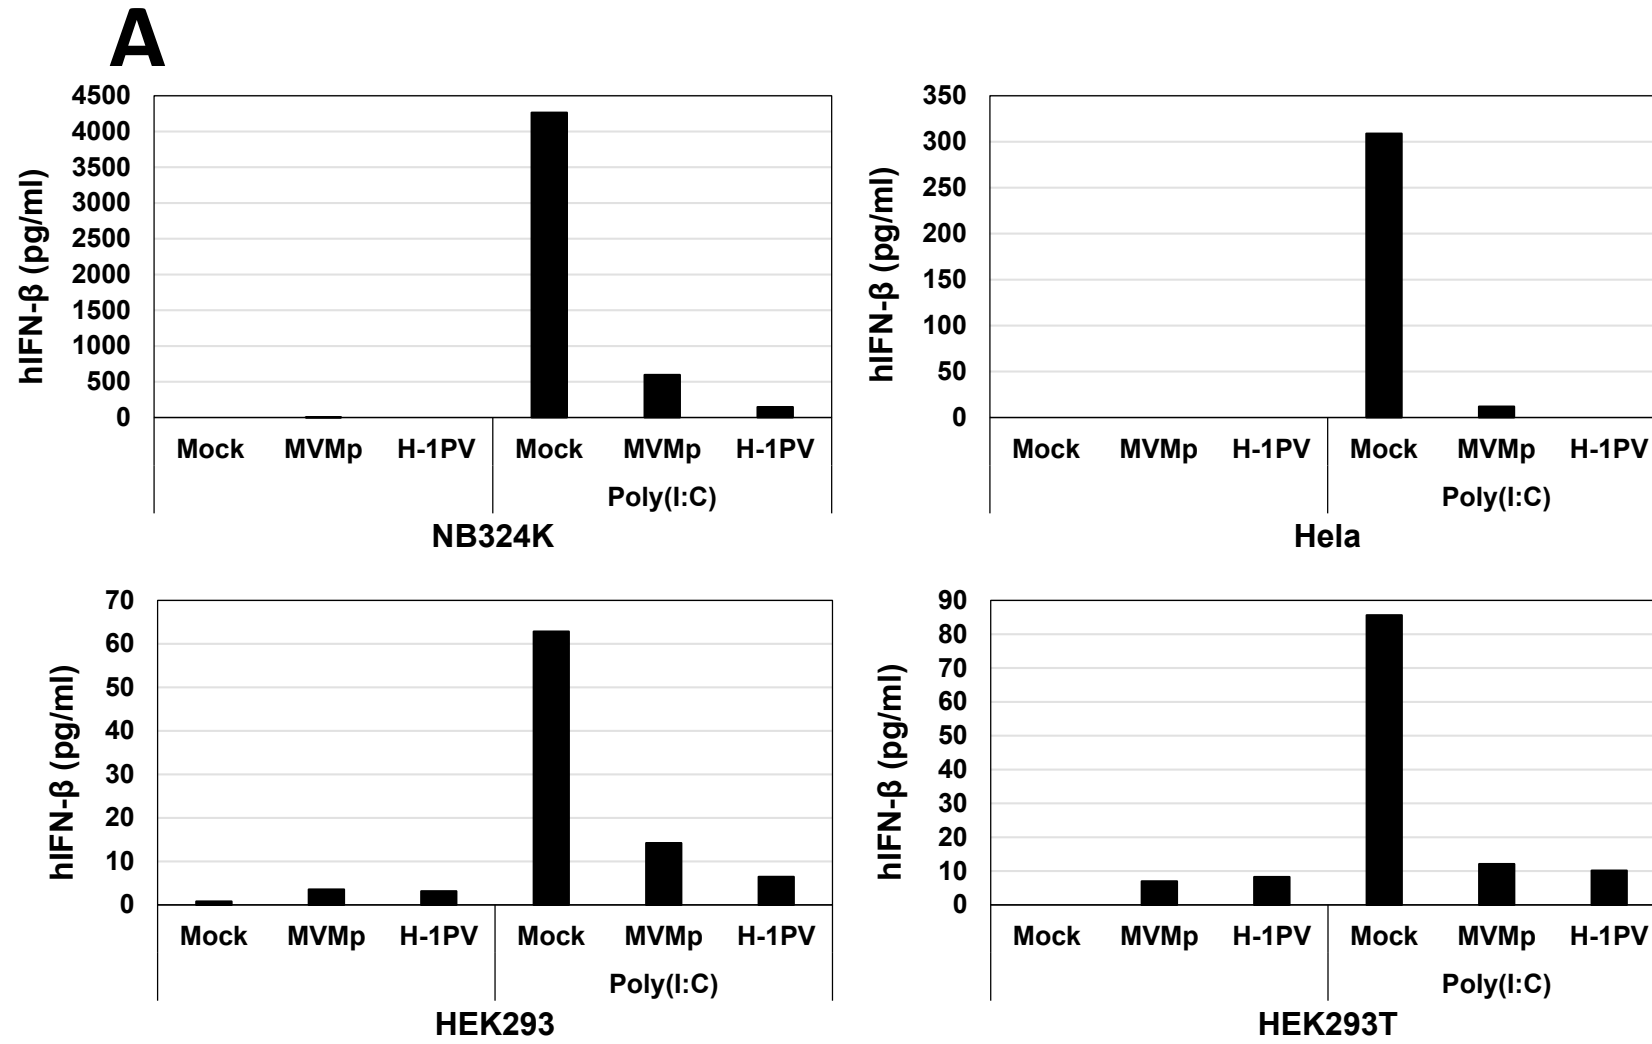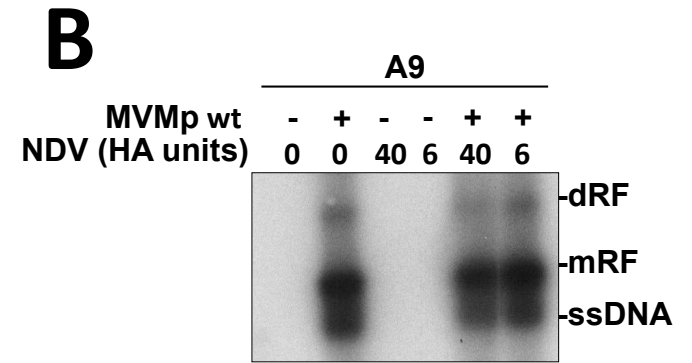

Supplement: s1 [file s1]
